# Supplementary material for: Maternal Vitamin D Status Correlates to Leukocyte Antigenic Responses in Breastfeeding Infants
Source: MDPI journal article supplement (doi:10.3390/nu14061266), 2022-03-17
Supplement: s1 [file s1]

**Table S1. Correlation of plasma 25-hydroxyvitamin D concentrations to cytokine release after *in vitro* antigenic stimulation of infant whole blood.**

| Cytokine <sup>1</sup> | Correlation to Maternal Plasma 25-D <sup>2</sup> | Correlation to Infant Plasma 25-D <sup>2</sup> |
|-----------------------|--------------------------------------------------|------------------------------------------------|
| IL-1 $\beta$          | r 0.01, p 0.98                                   | r -0.02, p 0.92                                |
| IL-2                  | r 0.08, p 0.63                                   | r 0.09, p 0.61                                 |
| IL-4                  | r 0.35, p 0.04                                   | r 0.18, p 0.30                                 |
| IL-6                  | r 0.16, p 0.35                                   | r 0.26, p 0.12                                 |
| IL-8                  | r 0.12, p 0.49                                   | r -0.04, p 0.82                                |
| IL-10                 | r 0.29, p 0.08                                   | r 0.47, p 0.004                                |
| IL-12                 | r 0.34, p 0.03                                   | r 0.47, p 0.003                                |
| IL-13                 | r 0.26, p 0.11                                   | r 0.13, p 0.45                                 |
| IFN $\gamma$          | r 0.41, p 0.08                                   | r 0.30, p 0.23                                 |
| TNF                   | r 0.29, p 0.07                                   | r 0.24, p 0.15                                 |
| TGF $\beta$ 1         | r 0.47, p 0.004                                  | r 0.30, p 0.07                                 |

<sup>1</sup>Measured in culture supernatants after 20 hr incubation of antigen-stimulated infant whole blood; <sup>2</sup>plasma total 25-D concentration from either mother or infant linearly correlated to cytokine release from infant whole blood from same visit; Pearson's correlation coefficient is (r) value with p-value.

**Table S2. Vitamin D sufficiency and cytokine release after *in vitro* antigenic stimulation of infant whole blood.**

| Cytokine <sup>1</sup> | Maternal 25-D<br>< 30 <sup>2</sup> | Maternal 25-D<br>≥ 30 <sup>2</sup> | p-value <sup>3</sup> | Infant 25-D<br>< 30 <sup>4</sup> | Infant 25-D<br>≥ 30 <sup>4</sup> | p-value <sup>5</sup> |
|-----------------------|------------------------------------|------------------------------------|----------------------|----------------------------------|----------------------------------|----------------------|
| IL-1 $\beta$          | 4.2 ± 8.1                          | 8.1 ± 11.6                         | 0.23                 | 6.7 ± 11.1                       | 5.7 ± 8.7                        | 0.80                 |
| IL-2                  | 100.8 ± 111                        | 97.3 ± 100                         | 0.92                 | 98.9 ± 109                       | 101 ± 101                        | 0.95                 |
| IL-4                  | 0.034 ± 0.023                      | 0.055 ± 0.028                      | 0.02                 | 0.042 ± 0.025                    | 0.047 ± 0.034                    | 0.64                 |
| IL-6                  | 31.2 ± 39                          | 56.2 ± 55                          | 0.12                 | 40.6 ± 44.2                      | 54.7 ± 60                        | 0.42                 |
| IL-8                  | 78.7 ± 35                          | 88.2 ± 33                          | 0.39                 | 84 ± 33                          | 83 ± 38                          | 0.93                 |
| IL-10                 | 0.19 ± 0.15                        | 0.27 ± 0.2                         | 0.15                 | 0.19 ± 0.13                      | 0.31 ± 0.24                      | 0.047                |
| IL-12                 | 0.033 ± 0.026                      | 0.064 ± 0.059                      | 0.049                | 0.040 ± 0.031                    | 0.070 ± 0.072                    | 0.08                 |
| IL-13                 | 0.37 ± 0.21                        | 0.52 ± 0.23                        | 0.04                 | 0.43 ± 0.21                      | 0.48 ± 0.28                      | 0.52                 |
| IFN $\gamma$          | 32.3 ± 36.3                        | 75.7 ± 40.3                        | 0.034                | 46.4 ± 36.8                      | 68.7 ± 47.8                      | 0.29                 |
| TNF                   | 10.5 ± 12.9                        | 29.5 ± 37.1                        | 0.04                 | 16.6 ± 23.2                      | 29.7 ± 40.4                      | 0.22                 |
| TGF $\beta$ 1         | 23.0 ± 9.5                         | 41.2 ± 29.6                        | 0.02                 | 27.4 ± 17.4                      | 38.4 ± 21.9                      | 0.12                 |

<sup>1</sup>Measured in culture supernatants after 20 hr incubation of antigen-stimulated infant whole blood; <sup>2</sup>cytokine release (mean ng/mL ± S.D) by stimulated whole blood from infants of mothers vitD sufficient (total plasma 25-D ≥ 30 ng/mL) or insufficient (plasma 25-D < 30); <sup>3</sup>p-value of analyses of variance between infants grouped by maternal vitD status (calculated by unpaired t-tests or Mann-Whitney tests, as appropriate); <sup>4</sup>cytokine release (mean ng/mL ± S.D) by stimulated whole blood from infants grouped by their own vitD status; <sup>5</sup>p-value of analysis of variance between infants grouped by their own vitD status.

**Table S3. Vitamin D sufficiency and cytokine release after *in vitro* antigenic stimulation of infant whole blood: Removal of statistically-calculated outliers.**

| Cytokine <sup>1</sup> | Maternal 25-D<br>< 30 <sup>2</sup> | Maternal 25-D<br>≥ 30 <sup>2</sup> | p-value <sup>3</sup> | Infant 25-D<br>< 30 <sup>4</sup> | Infant 25-D<br>≥ 30 <sup>4</sup> | p-value <sup>5</sup> |
|-----------------------|------------------------------------|------------------------------------|----------------------|----------------------------------|----------------------------------|----------------------|
| TNF                   | 6.4 ± 4.9                          | 18.6 ± 16.5                        | 0.02                 | N/A <sup>5</sup>                 | N/A                              | N/A                  |
| TGFβ1                 | 23.0 ± 9.5                         | 33.8 ± 19.8                        | 0.04                 | 24.7 ± 11.4                      | 35.0 ± 19.9                      | 0.08                 |

<sup>1</sup>As described for Table S2. <sup>2,3,4</sup>as described for Table S2, but extreme, statistically-calculated outliers removed to obtain data sets with normal distributions; t-tests re-run (as described in Methods); <sup>5</sup>N/A, data set did not require outlier removal (passed normality tests).

**Table S4. Effect of 25-hydroxyvitamin D<sub>3</sub> spike on cytokine release during *in vitro* antigenic stimulation of infant whole blood.**

| Cytokine <sup>1</sup> | 25-D <sub>3</sub> treatment<br>(Fold-difference) <sup>2</sup> | p-value |
|-----------------------|---------------------------------------------------------------|---------|
| IL-1β                 | 0.99                                                          | 0.95    |
| IL-2                  | 1.3                                                           | 0.26    |
| IL-4                  | 0.99                                                          | 0.84    |
| IL-6                  | 1.1                                                           | 0.49    |
| IL-8                  | 0.91                                                          | 0.33    |
| IL-10                 | 1.1                                                           | 0.33    |
| IL-12                 | 0.92                                                          | 0.49    |
| IL-13                 | 0.96                                                          | 0.60    |
| IFNγ                  | 1.4                                                           | 0.09    |
| TNF                   | 0.97                                                          | 0.84    |

<sup>1</sup>Release measured in culture supernatants after 20 hr incubation of antigen-stimulated infant whole blood with or without addition of 50 ng/mL 25-hydroxyvitamin D<sub>3</sub> (TGFβ was not measured); <sup>2</sup>mean ratios of cytokine release with/without added 25-D.
